# Supplementary material
Source: publisher figshare collection journal article supplement (https://sage.figshare.com/ndownloader/files/24045190)
Supplement: Supplementary file 1 [file 24045190]

## **Highlights**

### Highlight #1

Desiccant-based outdoor air-conditioning system using low-temperature energy proposed

### Highlight #2

Heat and mass transfer rate of zeolite-coated heat exchanger evaluated experimentally

### Highlight #3

Mathematical model developed for zeolite-coated heat exchanger

### Highlight #4

Equations with water temperature and air conditions predicted for proposed system
